# Supplementary material for: The energy dissipation and Mullins effect of tough polymer/graphene oxide hybrid nanocomposite hydrogels
Source: Royal Society of Chemistry journal article supplement (doi:10.1039/c7py01068k), 2017-01-01
Supplement: c7py01068k1.pdf [file c7py01068k1.pdf]

## Energy Dissipation and Mullins Effect of Tough Polymer/Graphene Oxide Hybrid Nanocomposite Hydrogels

Ziqing Tang<sup>1, #</sup>, Feng Chen<sup>1, #</sup>, Qiang Chen<sup>1\*</sup>, Lin Zhu<sup>1</sup>, Xiaoqiang Yan<sup>1</sup>, Hong Chen<sup>2</sup>,  
Baiping Ren<sup>2</sup>, Jia Yang<sup>1</sup>, Gang Qin<sup>1</sup>, and Jie Zheng<sup>2\*</sup>

<sup>1</sup>School of Materials Science and Engineering  
Henan Polytechnic University, Jiaozuo, China, 454003

<sup>2</sup>Department of Chemical and Biomolecular Engineering  
The University of Akron, Akron, Ohio, USA, 44325

# Equivalent contribution

\* Corresponding Author: [qiangcheneric@163.com](mailto:qiangcheneric@163.com) and [zhengj@uakron.edu](mailto:zhengj@uakron.edu)

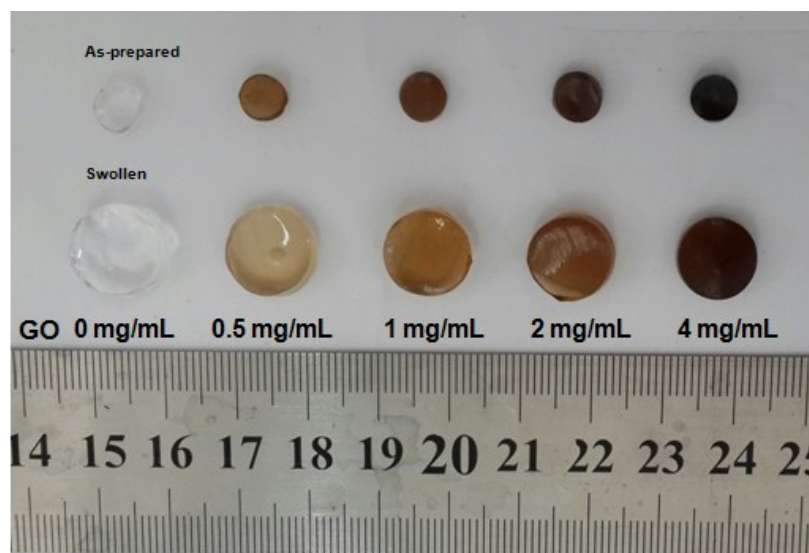

Figure S1. Swelling of PAAm/GO NC gels with various GO concentrations.

Table S1. Effect of MBA concentration on the tensile properties of PAAm/GO NC gels

| MBA (mol%) | $E$ (kPa) | $\sigma_f$ (MPa) | $\epsilon_f$ (mm/mm) | $W$ (MJ/m <sup>3</sup> ) |
|------------|-----------|------------------|----------------------|--------------------------|
| 0.01       | 49.70     | 0.01             | 6.84                 | 0.60                     |
| 0.03       | 46.16     | 0.23             | 11.94                | 1.92                     |
| 0.05       | 61.94     | 0.27             | 12.21                | 2.32                     |
| 0.07       | 65.88     | 0.27             | 13.76                | 2.51                     |
| 0.1        | 93.32     | 0.19             | 4.28                 | 0.71                     |

Table S2. Effect on strain rate on the tensile properties of PAAm/GO NC gels.

| Strain rate ( $s^{-1}$ ) | $E$ (kPa) | $\sigma_f$ (MPa) | $\epsilon_f$ (mm/mm) | $W$ (MJ/m <sup>3</sup> ) |
|--------------------------|-----------|------------------|----------------------|--------------------------|
| 0.006                    | 72.16     | 0.18             | 12.23                | 1.49                     |
| 0.036                    | 70.79     | 0.24             | 15.87                | 2.48                     |
| 0.060                    | 67.56     | 0.27             | 17.58                | 2.99                     |
| 0.129                    | 65.88     | 0.27             | 13.76                | 2.51                     |
| 0.244                    | 45.96     | 0.24             | 14.79                | 2.34                     |
